# Supplementary material for: A population-level strain genotyping method to study pathogen strain dynamics in human infections
Source: JCI journal article supplement (doi:10.1172/jci.insight.152472), 2021-12-21
Supplement: sd1 [file 1]

Figure S1

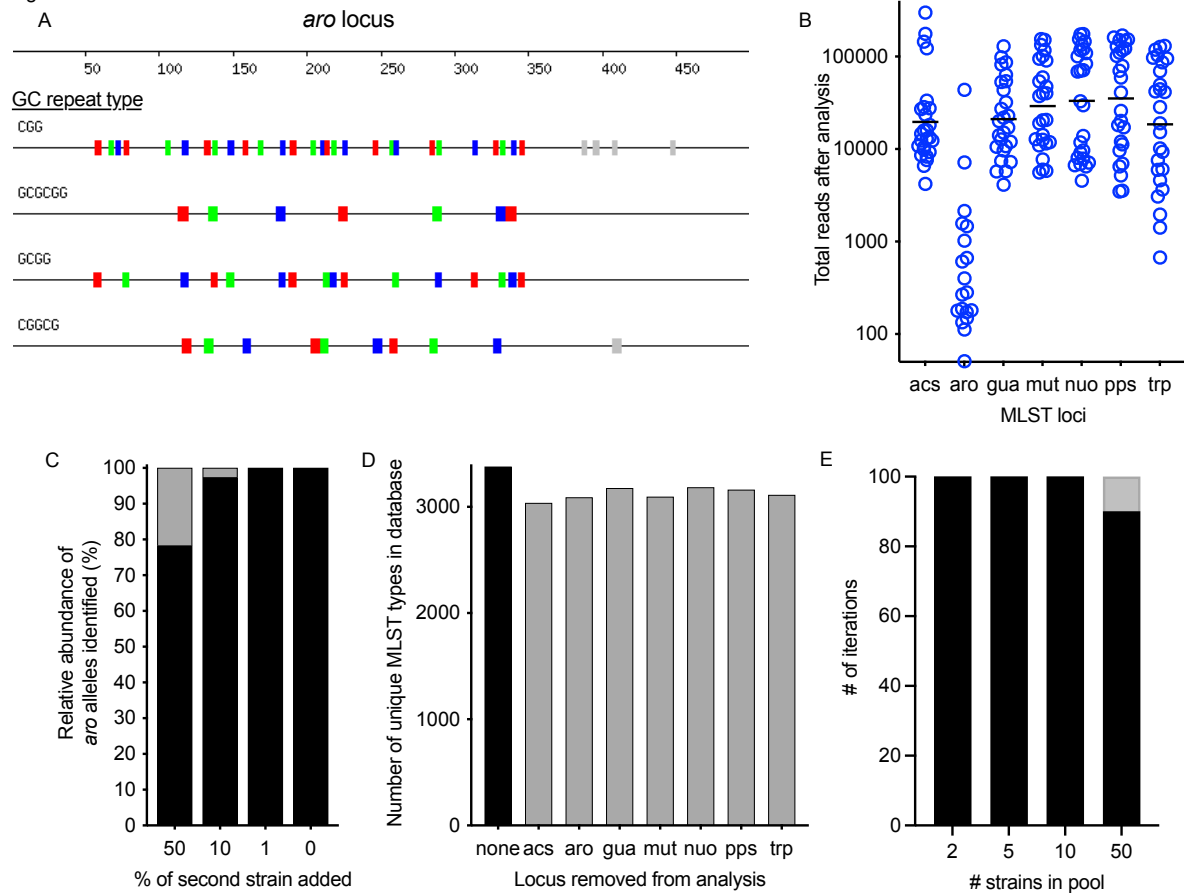

**Figure S1. *P. aeruginosa aro* MLST loci are underrepresented by PopMLST.** **A.** Schematic representation of high GC repeats in the *aro* MLST locus with each box showing the location of repeats identified by Geneious Prime 2020.1.1 (<https://www.geneious.com>). **B.** The number of reads recovered from *aro* are more than a log lower than other loci despite four-times higher levels of DNA used as input for Illumina sequencing. **C.** Despite the low number of reads as shown in B, the *aro* reads detected were in ratios are similar to the expected ratios of the strains and the ratios of the other loci shown in Figure 3C. **D.** Analysis of the 3391 MLST types in the *P. aeruginosa* MLST database shows that omitting any one of the seven MLST loci (indicated on the x-axis) still enables most MLST types to be identified. The number of unique combinations of MLST allele types when all seven alleles were utilized is indicated in black. The alleles for a given locus were removed and the analysis for unique combinations of allele types using the remaining six loci were determined (grey bars). **E.** Sets of two, five, ten, or 50 MLST types were randomly selected from the MLST database (<https://pubmlst.org/organisms/pseudomonas-aeruginosa/>) and the sets were used to determine if the other six loci (i.e. omitting *aro*) was sufficient to distinguish between the strains in the set. This analysis was repeated 100 times. Sets for which all MLST types could be distinguished without *aro* are shown in black. Sets for which *aro* was required for differentiation between MLST types in the set are in grey.

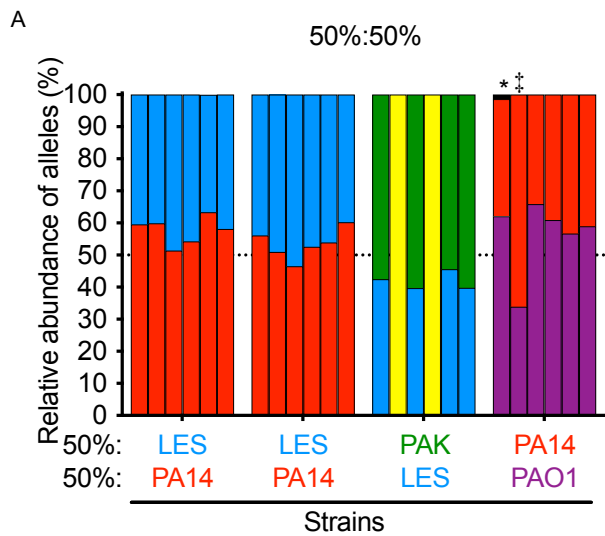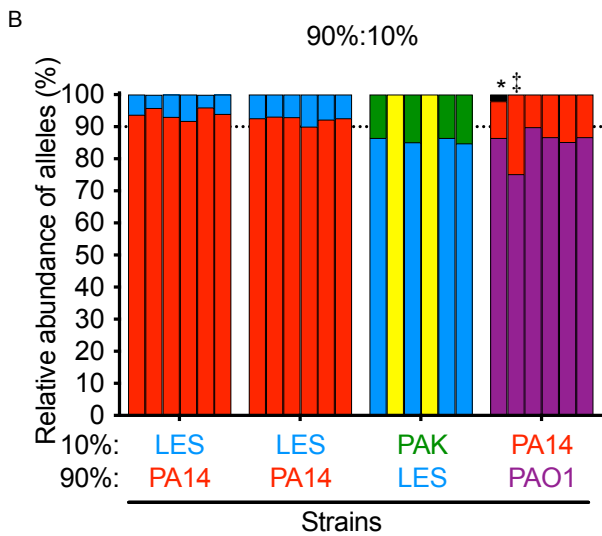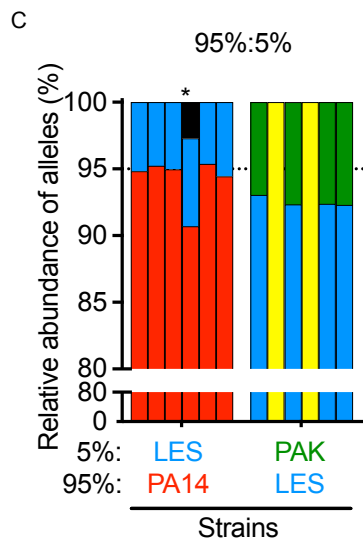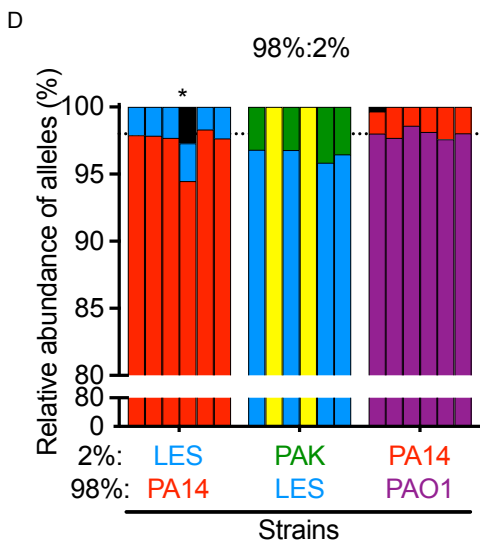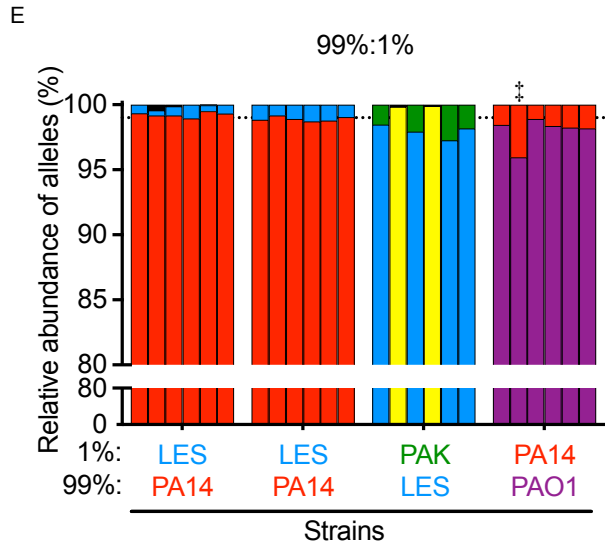

**Figure S2. PopMLST on mixtures of Pa laboratory strains reproducibly identifies the relative abundance of each strain.** We tested pairwise combinations of four Pa strains with different MLST types across a range of ratios. In all cases, the two strains were identified in ratios close to expected. Each strain is represented by a different color (PAO1=purple, PA14=blue, LES=red, and PAK=green). PA14 and PAK have the same sequence for two loci indicated in yellow. PopMLST was performed on mixtures of cultured colonies for the PAO1:LES experiments, all others were performed on mixtures of DNA. Each set of bars represents an independent experiment. MLST alleles identified but not present in the mixtures, likely due to sequencing error, are indicated in black and those detected at >1% are indicated with \*. ‡ indicates PCR bias as evidenced by one allele being consistently under- or over-represented.

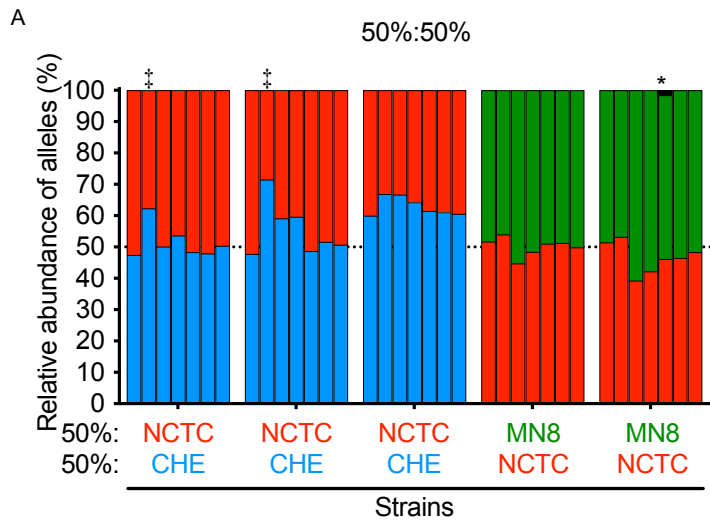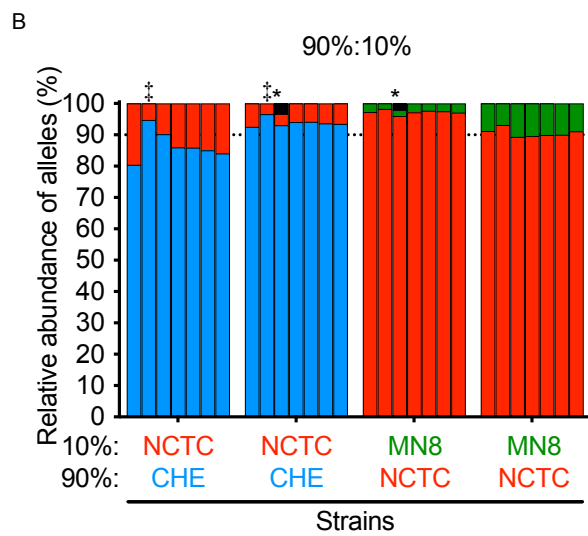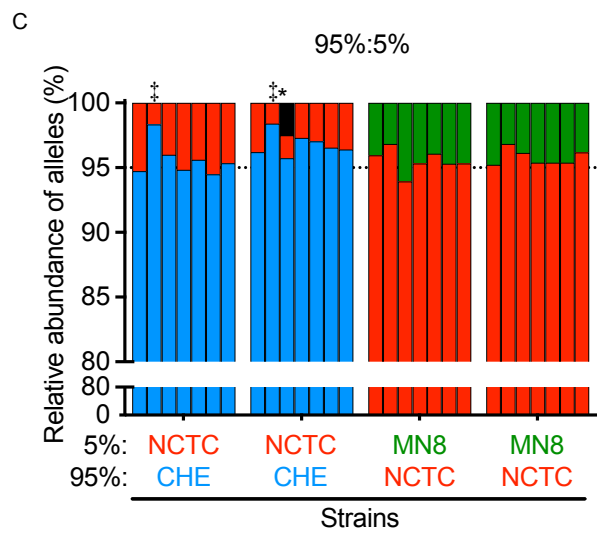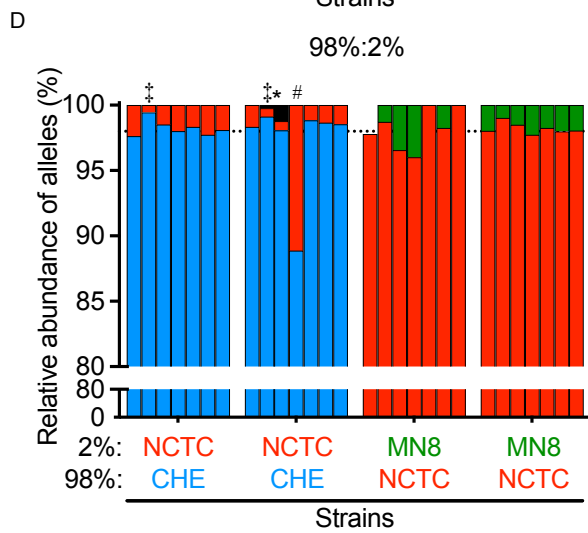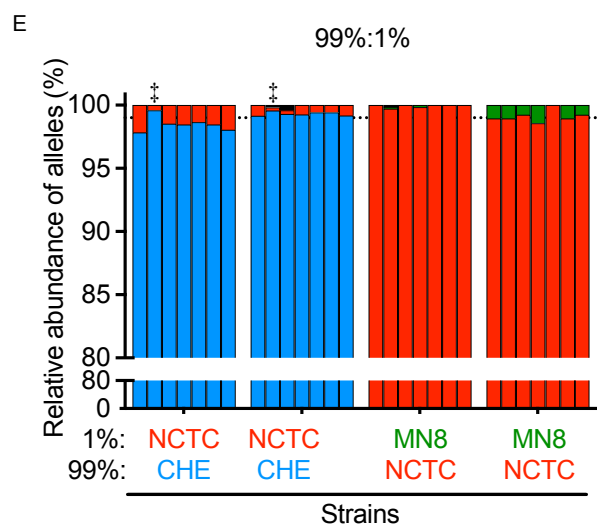

**Figure S3. PopMLST on mixtures of Sa laboratory strains reproducibly identifies the relative abundance of each strain.** We tested pairwise combinations of three Sa strains with ratios close to expected. Each strain is represented by a different color (NCTC8325=red, CHE=blue, MN8=green). Each set of bars represents an independent experiment. Black indicates the presence of a third allele. MLST alleles identified but not present in the mixtures, likely due to sequencing error, are indicated in black and those detected at >1% are indicated with \*. ‡ indicates PCR bias as evidenced by one allele being consistently under- or over-represented. # indicates non-systemic under/over representation of an allele, possibly due to jackpot amplifications.

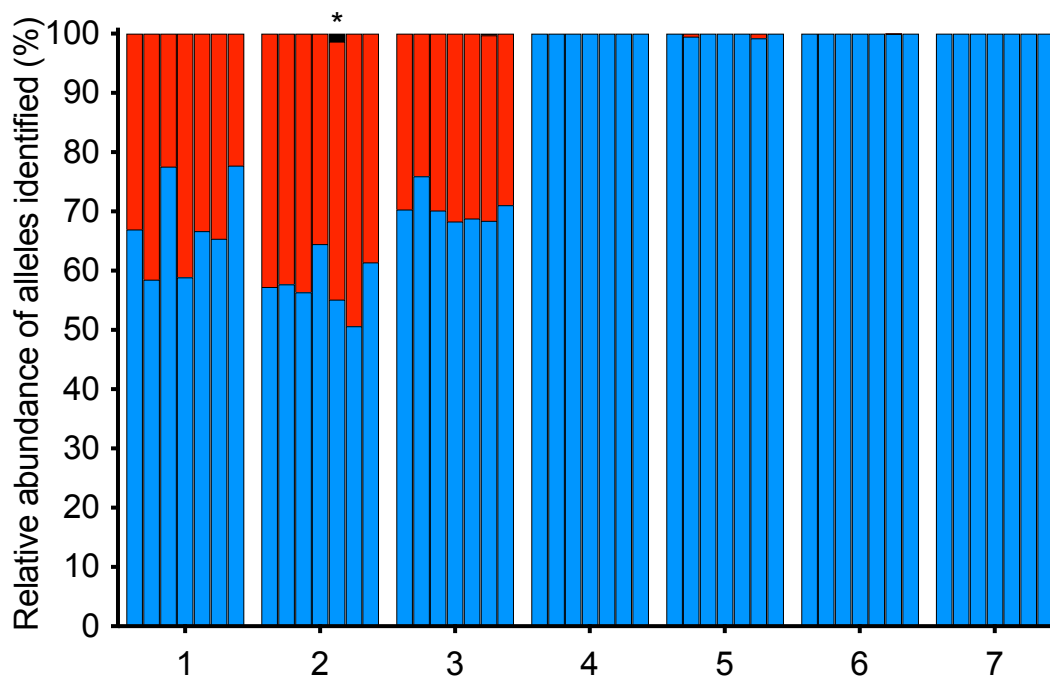

**Figure S4. Detection of multiple MLST loci types from isolates from sputum.** A) ~95 *Sa* isolates cultured on mannitol salts agar from sputum were selected from each subject. Growth from all ~95 isolates was pooled and popMLST performed. Blue indicates the predominant MLST locus type by abundance, and red indicates any secondary alleles detected. Subjects 1-3 are shown in Figure 6. Bars for each sample show relative abundance for *arc*, *aro*, *glp*, *gmk*, *pta*, *tpi*, and *yqi* (in order). \* indicates an additional MSLT type detected, with a single SNP, likely due to sequencing error.

**Table S1. *P. aeruginosa* clinical sample MLST types.**

| Subject <sup>a</sup> | acs | gua | mut | nuo | pps | trp |
|----------------------|-----|-----|-----|-----|-----|-----|
| 1                    | 36  | 28  | 3   | 4   | 13  | 7   |
| 2                    | 6   | 5   | 3   | 4*  | 15  | 7   |
| 3                    | 28  | 22  | 18* | 3   | 15  | 7   |
| A                    | 11  | 1   | 7   | 9   | 4   | 7   |
| B                    | 17  | 5   | 3   | 4   | 15  | 26  |
| C                    | 28  | 22  | 18  | 3   | 15  | 7   |

<sup>a</sup> Subject number corresponds to subjects in Figures 2 and 6C.

\* Number indicated is the allele type with the highest identity in the MLST database.

**Table S2. False positive detection of MLST loci is eliminated if PopMLST is repeated.**

Sequencing errors leading to false-positive calls of a Sa or Pa MLST locus (i.e calling a locus not present in the experimental mixture) were not detected when PopMLST was repeated a second and third time.

| Strain mixtures tested | Expected loci type | False loci type detected (at > 1%) | Proportion of samples in which false positive locus was detected (at > 1%). |                             |                             |
|------------------------|--------------------|------------------------------------|-----------------------------------------------------------------------------|-----------------------------|-----------------------------|
|                        |                    |                                    | In run that false positive was detected                                     | In repeat sequencing run #1 | In repeat sequencing run #2 |
| Sa NCTC+<br>Sa CHE     | glp_8<br>glp_1     | glp_23                             | 3/7                                                                         | 0/5                         | 0/2                         |
| Sa MN8 +<br>Sa NCTC    | glp_1<br>glp_2     | glp_6x                             | 1/5                                                                         | 0/6                         | 0/2                         |
|                        | pta_4<br>pta_6     | pta_495                            | 3/5                                                                         | 0/6                         | 0/2                         |
| Pa PA14+<br>Pa LES     | nuo_1<br>nuo_4     | nuo_23                             | 2/5                                                                         | 0/4                         | 0/3                         |

\* Mixtures of the same two strains at any ratio were grouped for this analysis.

**Table S3. *S. aureus* clinical sample MLST types.**

| subject <sup>a</sup> | arc | aro | glp | gmk | pta | tpi | yqi | MLST <sup>b</sup> |
|----------------------|-----|-----|-----|-----|-----|-----|-----|-------------------|
| 1                    | 3   | 35  | 19  | 2   | 20  | 26  | 39  | 398               |
|                      | 1   | 1   | 1   | 1   | 1   | 1   | 1   | 1                 |
| 2                    | 2   | 2   | 2   | 2   | 6   | 3   | 2   | 30                |
|                      | 3   | 3   | 1   | 1   | 1   | 1   | 10  | 9                 |
| 3                    | 2   | 2   | 2   | 2   | 2   | 2   | 2   | 39                |
| 4                    | 2   | 2   | 2   | 2   | 6   | 3   | 2   | 30                |
|                      | 5   | 4   | 1   | 4   | 4   | 6   | 3   | 7                 |
| 5                    | 13  | 13  | 1   | 1   | 12  | 11  | 13  | 15                |
| 6                    | 10  | 14  | 8   | 6   | 10  | 3   | 2   | 45                |
| 7                    | 4   | 1   | 4   | 1   | 5   | 5   | 4   | 25                |
| 8                    | 3   | 3   | 1   | 1   | 4   | 4   | 3   | 8                 |
|                      | 2   | 2   | 2   | 2   | 6   | 3   | 2   | 30                |
| 9                    | 1   | 4   | 1   | 4   | 12  | 1   | 10  | 5                 |
|                      | 2*  | 2   | 2   | 2   | 6   | 3   | 2   | -                 |
| 10                   | 1   | 4   | 1   | 4   | 12  | 1   | 10  | 5                 |
|                      | 10  | 14  | 8   | 6   | 10  | 37  | 2   | 256               |
| 11                   | 1   | 4   | 1   | 4   | 6   | 1   | 10  | -                 |
|                      | 2   | 2   | 2   | 2   | 12  | 3   | 10  | -                 |
| 12                   | 10  | 14  | 8   | 6   | 10  | 3   | 2   | 45                |
|                      | 1   | 4   | 1   | 4   | 12  | 1   | 28  | 105               |

<sup>a</sup> Subject number corresponds to subjects in Figures 6A, 6D, and S4.

<sup>b</sup> When two strains are present, MLST type determined by relative abundance of alleles and confirmed by sanger sequencing of individual isolates.

– Indicates this MLST type is not in the database.

\* Number indicated is the allele type with the highest identity in the MLST database.

**Table S4. *S. aureus* strains and MLST types**

| Strain   | arc | aro | glp | gmk | pta | tpi | yqi | MLST type |
|----------|-----|-----|-----|-----|-----|-----|-----|-----------|
| NCTC8325 | 3   | 3   | 1   | 1   | 4   | 4   | 3   | 8         |
| CHE482   | 10  | 14  | 8   | 6   | 10  | 3   | 2   | 45        |
| MN8      | 2   | 2   | 2   | 2   | 6   | 3   | 2   | 30        |
| CF*      | 13  | 13  | 1   | 1   | 12  | 11  | 13  | 15        |

\* Clinical isolate is from patient with Cystic Fibrosis.

**Table S5. *P. aeruginosa* strains and MLST types**

| Strain | acs | aro | gua | mut | nuo | pps | trp | MLST type |
|--------|-----|-----|-----|-----|-----|-----|-----|-----------|
| PA14   | 4   | 4   | 16  | 12  | 1   | 6   | 3   | 253       |
| LES    | 6   | 5   | 11  | 3   | 4   | 23  | 1   | 146       |
| PAO1   | 7   | 5   | 12  | 3   | 4   | 1   | 7   | 549       |
| PAK    | 11  | 5   | 11  | 11  | 4   | 4   | 14  | 693       |
| CF5*   | 28  | 5   | 30  | 3   | 3   | 4   | 14  | 1538      |
| CF6*   | 40  | 5   | 11  | 5   | 4   | 38  | 37  | 167       |
| CF2*   | 11  | 76  | 5   | 3   | 61  | 14  | 3   | 485       |

\* Clinical isolate is from patient with Cystic Fibrosis.

**Table S6. Primers used for PopMLST**

| MLST loci | Published MLST primer    | PopMLST primer                                                |
|-----------|--------------------------|---------------------------------------------------------------|
| SaarcF    | TTGATTCACCAGCGCGTATTGTC  | TCGTCGGCAGCGTCAGATGTGTATAAGAGACAGCCGTTGATTCACCAGCGCGTATTGTC   |
| SaarcR    | AGGTATCTGCTTCAATCAGCG    | GTCTCGTGGGCTCGGAGATGTGTATAAGAGACAGGCTAGGTATCTGCTTCAATCAGCG    |
| SaaroF    | ATCGGAAATCCTATTTACATTC   | TCGTCGGCAGCGTCAGATGTGTATAAGAGACAGCCGATCGGAAATCCTATTTACATTC    |
| SaaroR    | GGTGTGTATTAATAACGATATC   | GTCTCGTGGGCTCGGAGATGTGTATAAGAGACAGGCTGGTGTGTATTAATAACGATATC   |
| SaglpF    | CTAGGAACTGCAATCTTAATCC   | TCGTCGGCAGCGTCAGATGTGTATAAGAGACAGCCGCTAGGAACTGCAATCTTAATCC    |
| SaglpR    | TGGTAAAATCGCATGTCCAATTC  | GTCTCGTGGGCTCGGAGATGTGTATAAGAGACAGGCTTGGTAAAATCGCATGTCCAATTC  |
| SagmkF    | ATCGTTTTATCGGGACCATC     | TCGTCGGCAGCGTCAGATGTGTATAAGAGACAGCCGATCGTTTTATCGGGACCATC      |
| SagmkR    | TCATTAACTACAACGTAATCGTA  | GTCTCGTGGGCTCGGAGATGTGTATAAGAGACAGGCTTCATTAACTACAACGTAATCGTA  |
| SaptaF    | GTTAAAATCGTATTACCTGAAGG  | TCGTCGGCAGCGTCAGATGTGTATAAGAGACAGCCGGTAAAATCGTATTACCTGAAGG    |
| SaptaR    | GACCCTTTTGTTGAAAAGCTTAA  | GTCTCGTGGGCTCGGAGATGTGTATAAGAGACAGGCTGACCCTTTTGTTGAAAAGCTTAA  |
| SatpiF    | TCGTTCAATTCTGAACGTCGTGAA | TCGTCGGCAGCGTCAGATGTGTATAAGAGACAGCCGTCGTTCAATTCTGAACGTCGTGAA  |
| SatpiR    | TTTGCACCTTCTAACAATTGTAC  | GTCTCGTGGGCTCGGAGATGTGTATAAGAGACAGGCTTTTGCACCTTCTAACAATTGTAC  |
| SayqiF    | CAGCATA CAGGACACCTATTGGC | TCGTCGGCAGCGTCAGATGTGTATAAGAGACAGCCG CAGCATA CAGGACACCTATTGGC |
| SayqiR    | CGTTGAGGAATCGATACTGGAAC  | GTCTCGTGGGCTCGGAGATGTGTATAAGAGACAGGCTCGTTGAGGAATCGATACTGGAAC  |
| PaacsF    | GCCACACCTACATCGTCTAT     | TCGTCGGCAGCGTCAGATGTGTATAAGAGACAGCCGCCACACCTACATCGTCTAT       |
| PaacsR    | AGGTTGCCGAGGTTGTCCAC     | GTCTCGTGGGCTCGGAGATGTGTATAAGAGACAGAGGTTGCCGAGGTTGTCCAC        |
| PaaroF    | ATGTCACCGTGCCGTTCAAG     | TCGTCGGCAGCGTCAGATGTGTATAAGAGACAGCCAATGTCACCGTGCCGTTCAAG      |
| PaaroR    | GTTCCCTGGCTGACGGAAGT     | GTCTCGTGGGCTCGGAGATGTGTATAAGAGACAGGGTTGAAGGCAGTCGGTTCCTTG     |
| PaguaF    | AGGTCGGTTCCTCCAAGGTC     | TCGTCGGCAGCGTCAGATGTGTATAAGAGACAGCCAGGTCGGTTCCTCCAAGGTC       |
| PaguaR    | GACGTTGTGGTGCGACTTGA     | GTCTCGTGGGCTCGGAGATGTGTATAAGAGACAGCGACGTTGTGGTGCGACTTGA       |
| PamutF    | AGAAGACCGAGTTCGACCAT     | TCGTCGGCAGCGTCAGATGTGTATAAGAGACAGCCGAGAAGACCGAGTTCGACCAT      |
| PamutR    | GGTGCCATAGAGGAAGTCAT     | GTCTCGTGGGCTCGGAGATGTGTATAAGAGACAGGCAGGGTGCCATAGAGGAAGTCAT    |
| PanuoF    | ACGGCGAGAACGAGGACTAC     | TCGTCGGCAGCGTCAGATGTGTATAAGAGACAGCCACGGCGAGAACGAGGACTAC       |
| PanuoR    | TGGCGGTTCGGTGAAGGTGAA    | GTCTCGTGGGCTCGGAGATGTGTATAAGAGACAGTGGCGGTTCGGTGAAGGTGAA       |
| PappsF    | GGTGACGACGGCAAGCTGTA     | TCGTCGGCAGCGTCAGATGTGTATAAGAGACAGGGTGACGACGGCAAGCTGTA         |
| PappsR    | GTATCGCCTTCGGCACAGGA     | GTCTCGTGGGCTCGGAGATGTGTATAAGAGACAGGGTATCGCCTTCGGCACAGGA       |
| PatrpF    | TTCAACTTCGGCGACTTCCA     | TCGTCGGCAGCGTCAGATGTGTATAAGAGACAGCTTTTCAACTTCGGCGACTTCCATGT   |
| PatrpR    | GGTGTCCATGTTGCCGTTCC     | GTCTCGTGGGCTCGGAGATGTGTATAAGAGACAGCGGTGTCCATGTTGCCGTTCC       |

Table S7. PCR conditions

| Loci                 | PCR reagent          | Ta |
|----------------------|----------------------|----|
| <i>S. aureus</i>     |                      |    |
| arc                  | Q5 (NEB)             | 61 |
| aro                  | Q5 (NEB)             | 56 |
| glp                  | Q5 (NEB)             | 56 |
| gmk                  | Phusion (NEB)        | 56 |
| pta                  | Q5 (NEB)             | 61 |
| tpi                  | Q5 (NEB)             | 61 |
| yqi                  | Q5 (NEB)             | 61 |
| <i>P. aeruginosa</i> |                      |    |
| arc                  | Kapa (Roche)         | 59 |
| gua                  | Kapa (Roche)         | 59 |
| mut                  | Q5 + GC buffer (NEB) | 55 |
| nuo                  | Kapa (Roche)         | 62 |
| pps                  | Q5 + GC buffer (NEB) | 67 |
| trp                  | Q5 + GC buffer (NEB) | 67 |
